# Supplementary material
Source: publisher site journal article supplement (https://www.dovepress.com/get_supplementary_file.php?f=359413.docx)
Supplement: Supplementary file 1 [file get_supplementary_file.php]

# Annexes;

## **Annex 1:** Informed Consent (English version)

Arba Minch University,

Hello, my name is _______.

I am here on behalf of Eshetu Yisihak and his co-investigators. They are conducting research on the assessment of adolescent girls’ knowledge and associated factors for the human papillomavirus vaccination. The aim of this study is to assess primary school girls' knowledge of the human papillomavirus vaccination and associated factors in Arba Minch town. You have been selected by random sampling technique to participate in this study because you are currently attending one of the selected schools for the study purpose. Your participation is purely based on your willingness. You have the right to choose not to take part in this study. If you choose to take part, you have the right to stop at any time. Participating in this study will not cause any risk or harm. Whether you are willing to participate, refuse, or decide to withdraw later, you will not be subjected to any harm. If you decide to participate in the study, you will be asked to answer different questions about yourself, your knowledge of HPV vaccination, and other related questions. Trained individuals are going to guide you through filling out the questionnaires. Any information that you provide will be kept confidential. Names will not be written or specified. The data will not be used for purposes other than the study. Your willingness and active participation are very important for the success of this study. If you have any questions, please call the principal investigator at 0926266071 or 66875486. E-mail: eshetuyisihak@gmail.com alternatively, co-investigators;

Feleke Gebremeskel: fgfpeace@gmail.com

Desta Markos:  destmark11@gmail.com

Samuel Abebe: samiabe29@yahoo.com

Gebresilasea Gendisha Ukke: [gebretecno@gmail.com](mailto:gebretecno@gmail.com)

If you are willing to participate, please confirm with your signature. Participant Signature___________________Date ___________________________

## **Annex 2:** Guardian/parents/consent form (WHO Ethics Review Committee standard) English version

This informed consent form is for guardians/parents/adolescent girls participating in the research titled, "Assessment of the Knowledge and Associated Factors of Human Papillomavirus Vaccination among Adolescent Girls of Arba Minch Town Primary Schools." Eshetu Yisihak and co-investigators are doing research that might help our health policy by helping teenage girls become healthier. In this research, we will talk to many female students and ask them a number of questions. We are doing research among children, so we wanted to talk to the guardians or parents and ask for their permission. After you have heard more about the study, and if you agree, then the next thing we will do is ask your student/daughter/for her agreement as well. Both of you have to agree independently before we can begin. We would like to ask your student/daughter to participate because she is a teenager attending class at this school. Your student/daughter/s will fill out a questionnaire which will be provided and collected by trained data collectors. We are asking your students/daughters to participate in a survey that will take about a few minutes of their time. There will be no immediate and direct benefit to your students', daughter's, or to you, but your students', daughter's, or participation is likely to help us find out more about the knowledge of teenage girls, and we hope that this will help the country's health policy meet those needs better in the future. We will not be sharing information about your students/daughters other than for research purposes. If you have any questions, you may ask them now or later, even after the study has started by using the address. Eshetu Yisihak (0926266071; eshetuyisihak@gmail.com) or colleagues

Feleke Gebremeskel: fgfpeace@gmail.com

Desta Markos: destmark11@gmail.com

Samuel Abebe: samiabe29@yahoo.com

Gebresilasea Gendisha Ukke: gebretecno@gmail.com

Certificate of Consent

I have been asked to give consent for my student/daughter to participate in this research study, which will involve her completing one questionnaire. I have read the foregoing information, and I have had the opportunity to ask questions about it. I voluntarily consent for my students/daughters to participate as participants in this study. Homeroom teacher(s) or guardian(s)/parent(s) Date____________________________

**Annex 3:** ENGLISH VERSION QUESTIONARIES

Arba Minch University, Arba Minch, Ethiopia

|  | **Part1. Socio-demographic related questions** | | | |
| --- | --- | --- | --- | --- |
| Number | Question and filters | Response/Choices |  | Skip |
| 101 | How old are you? | **-------years** |  |  |
| 102 | What is your religion? | 1. Protestant  2. Orthodox 3.Catholic  4. Muslim 5.Traditional 6.Other (specify) |  |  |
| 103 | What is your ethnic group that you belong? | 1.Gamo  2.Gofa  3. Amhara 4. Oromo  5.wolayta  6.Other specify |  |  |
| 104 | Which grade are you now? | **------** |  |  |
| 105 | What is your school type? | 1.Public  2.Private |  |  |
| 106 | What is your mother’s educational status**?** | 1.No education  2.Primary  3.Secondary  4. More than secondary |  |  |
| 107 | What is your father’s educational status**?** | 1.No education  2.Primary  3.Secondary  4. More than secondary |  |  |
| 108 | Where your families live? | 1. urban  2.rural |  |  |

| **s.n** | **Part-2. Knowledge of HPV vaccination** | | | | |
| --- | --- | --- | --- | --- | --- |
| 201 | | Do you know about HPV vaccination? | 1.Yes  2. No |  |  |
| 202 | | What is HPV vaccination? | 1.given for prevention of cervical cancer  2. given for prevention of malaria  3. given for prevention of HIV AIDS  4.others specify |  |  |
| 203 | | Should the HPV vaccination be given before the first  sexual intercourse? | 1.Yes  2. No |  |  |
| 204 | | How many times someone should take HPV vaccination? | 1.ones  2.two times |  |  |
| 205 | | At what age should someone undergo HPV vaccination? | 1. 9-14 years  2. 18-21 years  3. All ages  4. I don’t know |  |  |
| 206 | | At what interval should someone take next HPV vaccination? | 1. 6 month  2. 6 years  3. 1 month  4. 3 month |  |  |
| 207 | | Is it advisable to have cervical cancer screening after HPV vaccination? | 1.Yes  2. No |  |  |
| 208 | | Obtained information about HPV vaccination from any source | 1.yes  2.no |  |  |
| 209 | | Source of information | 1. social media  2. health care worker  3. families and friends |  |  |
| 210 | | In your school, is there any reproductive health related information/clubs? | 1. Yes 2. No |  |  |

THANK YOU FOR YOUR CO-OPERATION!!
